# Supplementary material for: Penttinen syndrome‐associated PDGFRB Val665Ala variant causes aberrant constitutive STAT1 signalling
Source: PubMed Central journal article supplement (PMC9279580; doi:10.1111/jcmm.17427), 2022-06-10
Supplement: JCMM-26-3902-s001.pdf [file JCMM-26-3902-s001.pdf]

## Supplementary figure S2

**A**

| Term                                  | Count | %    | P-Value |
|---------------------------------------|-------|------|---------|
| cellular response to interferon-beta  | 23    | 18   | 8,9E-41 |
| defense response to virus             | 25    | 19,5 | 2,2E-28 |
| immune system process                 | 27    | 21,1 | 3,6E-22 |
| GTPase activity                       | 23    | 18   | 5,4E-22 |
| response to virus                     | 17    | 13,3 | 3,5E-21 |
| GTP binding                           | 27    | 21,1 | 4,9E-21 |
| innate immune response                | 26    | 20,3 | 1,9E-20 |
| defense response                      | 14    | 10,9 | 3,1E-14 |
| defense response to protozoan         | 9     | 7    | 2,1E-12 |
| cellular response to interferon-gamma | 10    | 7,8  | 7,2E-11 |

**B**

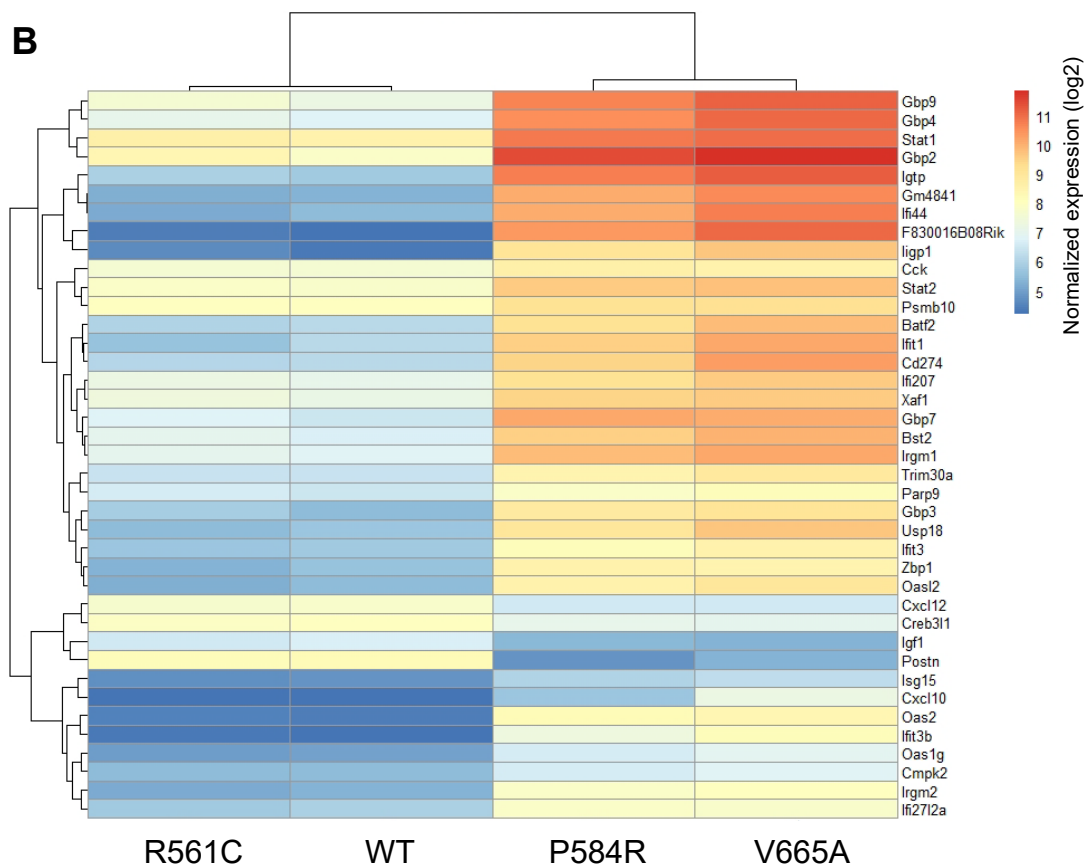

### V665A and P584R trigger an interferon-like transcriptional response.

NIH3T3 cells expressing the indicated receptor were produced as described in figure 3. Total RNA was extracted and used to hybridize Affymetrix microarrays (Clariom D array, #520851), according to the manufacturer instructions. (A) Using the Bioconductor limma package, we identified 128 known transcripts that were up-regulated at least two fold in cells expressing  $\beta$ V665A compared to the wild-type receptor. This list was analyzed using DAVID Bioinformatics Resources (<https://david.abcc.ncifcrf.gov>, version 6.8). The top ten gene ontology terms are shown.

(B) The expression levels of interferon target genes is shown in the four analyzed conditions.
