# Supplementary material for: Penttinen syndrome‐associated PDGFRB Val665Ala variant causes aberrant constitutive STAT1 signalling
Source: PubMed Central journal article supplement (PMC9279580; doi:10.1111/jcmm.17427), 2022-06-10
Supplement: JCMM-26-3902-s003.pdf [file JCMM-26-3902-s003.pdf]

**Supplementary Table 1.** List of antibodies used in Western Blot.

| <b>Antibody name</b>                 | <b>Company</b>                     | <b>Dilution</b> |
|--------------------------------------|------------------------------------|-----------------|
| Anti-PY99                            | Santa Cruz Biotechnology (sc-7020) | 1/200           |
| Anti-PDGFR $\beta$ (Ct-terminus)     | Santa Cruz Biotechnology (sc-432)  | 1/400           |
| Anti-PDGFR $\beta$ (Ct-terminus)     | Cell Signaling Technology (3169)   | 1/1000          |
| Anti-phospho-STAT1 (Tyr701)          | Cell Signaling Technology (9167)   | 1/500           |
| Anti-STAT1                           | BD Biosciences (610115)            | 1/1000          |
| Anti-phospho-STAT3 (Tyr705)          | Cell Signaling Technology (9131)   | 1/500           |
| Anti-STAT3                           | Cell Signaling Technology (9132)   | 1/1000          |
| Anti-phospho-STAT5 (Tyr694)          | Cell Signaling Technology (9351)   | 1/1000          |
| Anti-STAT5                           | Santa Cruz Biotechnology (sc-835)  | 1/1000          |
| Anti-phospho-AKT1 (Ser473)           | Cell Signaling Technology (9018)   | 1/1000          |
| Anti-AKT                             | Cell Signaling Technology (9272)   | 1/1000          |
| Anti-phospho-PLC $\gamma$ 1 (Tyr783) | Cell Signaling Technology (2821)   | 1/1000          |
| Anti-PLC $\gamma$ 1                  | Cell Signaling Technology (2822)   | 1/1000          |
| Anti-ACTB                            | Sigma (A5441)                      | 1/2000          |
| Anti-Calnexin                        | Enzo (ADI-SPA-860-D)               | 1/1000          |
| Anti-rabbit IgG                      | Cell Signaling Technology (7074)   | 1/5000          |
| Anti-mouse IgG                       | Cell Signaling Technology (7076)   | 1/5000          |

**Supplementary Table 2.** List of antibodies used in Flow Cytometry.

| <b>Antibody name</b>                                          | <b>Company</b>                       | <b>Dilution</b> |
|---------------------------------------------------------------|--------------------------------------|-----------------|
| Anti-human PDGFR $\beta$                                      | Homemade (AH17.2, reference [20])    | 1/300           |
| F'2 Fragment Donkey Anti-Mouse IgG coupled to R-Phycoerythrin | Jackson ImmunoResearch (715-116-150) | 1/100           |

**Supplementary Table 3.** List of primers used for Real-Time PCR in NIH3T3 cells.

| <b>Target</b> | <b>Primers sequence (5'-3')</b>                                   | <b>Tm</b> |
|---------------|-------------------------------------------------------------------|-----------|
| PDGFRB        | Forward GACCCCAAACCCGAGGTT<br>Reverse ATGGTTGAGGAGGTGTTGACTT      | 60°C      |
| CXCL9         | Forward ACGGAGATCAAACCTGCCTA<br>Reverse TTCCTTGAACGACGACGACT      | 60°C      |
| CXCL10        | Forward CATCCCTGCGAGCCTATCC<br>Reverse CATCTCTGCTCATCATTCTTTTCA   | 60°C      |
| CXCL11        | Forward ACTATGAAGGCTCATAAACGACAA<br>Reverse TTCTTATTGGAGGGCTCACAG | 60°C      |
| IRF1          | Forward ACTGTCACCGTGTGTCGTC<br>Reverse TCTGTTGCGGCTTCGGAGG        | 60°C      |
| USP18         | Forward TGCAGGGTCTGTTCACCATC<br>Reverse GCACATGTCGGAGCTTGCTA      | 60°C      |
| OASL2         | Forward GGATGCCTGGGAGAGAATCG<br>Reverse TCGCCTGCTCTTCGAAACTG      | 60°C      |
| ACTINE B      | Forward CTCTGGCTCCTAGCACCATGAAG<br>Reverse GCTGGAAGGTGGACAGTGAG   | 60°C      |

**Supplementary Table 4.** List of primers used for PDGFRB site-directed mutagenesis.

| <b>Mutation</b> | <b>Primers sequence (5'-3')</b>                                                            | <b>Tm</b> |
|-----------------|--------------------------------------------------------------------------------------------|-----------|
| p.R561C         | Forward TTTGGCAGAAGAAGCCATGTTACGAGATCCGATGG<br>Reverse CCATCGGATCTCGTAACATGGCTTCTTCTGCCAAA | 55°C      |
| p.W566R         | Forward GCCACGTTACGAGATCCGAAGGAAGGTGATTGAG<br>Reverse CTCAATCACCTTCCTTCGGATCTCGTAACGTGGC   | 55°C      |
| p.P584R         | Forward ATCTACGTGGACCGCATGCAGCTGCCC<br>Reverse GGGCAGCTGCATGCGGTCCACGTAGAT                 | 55°C      |
| p.V665A         | Forward CCACCTGAACGTGGCCAACCTGTTGGGGG<br>Reverse CCCCCAACAGGTTGGCCACGTTTCAGGTGG            | 55°C      |
| p.N666H         | Forward CCTGAACGTGGTCCACCTGTTGGGGGC<br>Reverse GCCCCAACAGGTTGGACCACGTTTCAGG                | 55°C      |
| p.N666K         | Forward CCTGAACGTGGTCAAGCTGTTGGGGGC<br>Reverse GCCCCAACAGCTTGACCACGTTTCAGG                 | 55°C      |
