# Supplementary material for: Penttinen syndrome‐associated PDGFRB Val665Ala variant causes aberrant constitutive STAT1 signalling
Source: PubMed Central journal article supplement (PMC9279580; doi:10.1111/jcmm.17427), 2022-06-10
Supplement: JCMM-26-3902-s004.pdf [file JCMM-26-3902-s004.pdf]

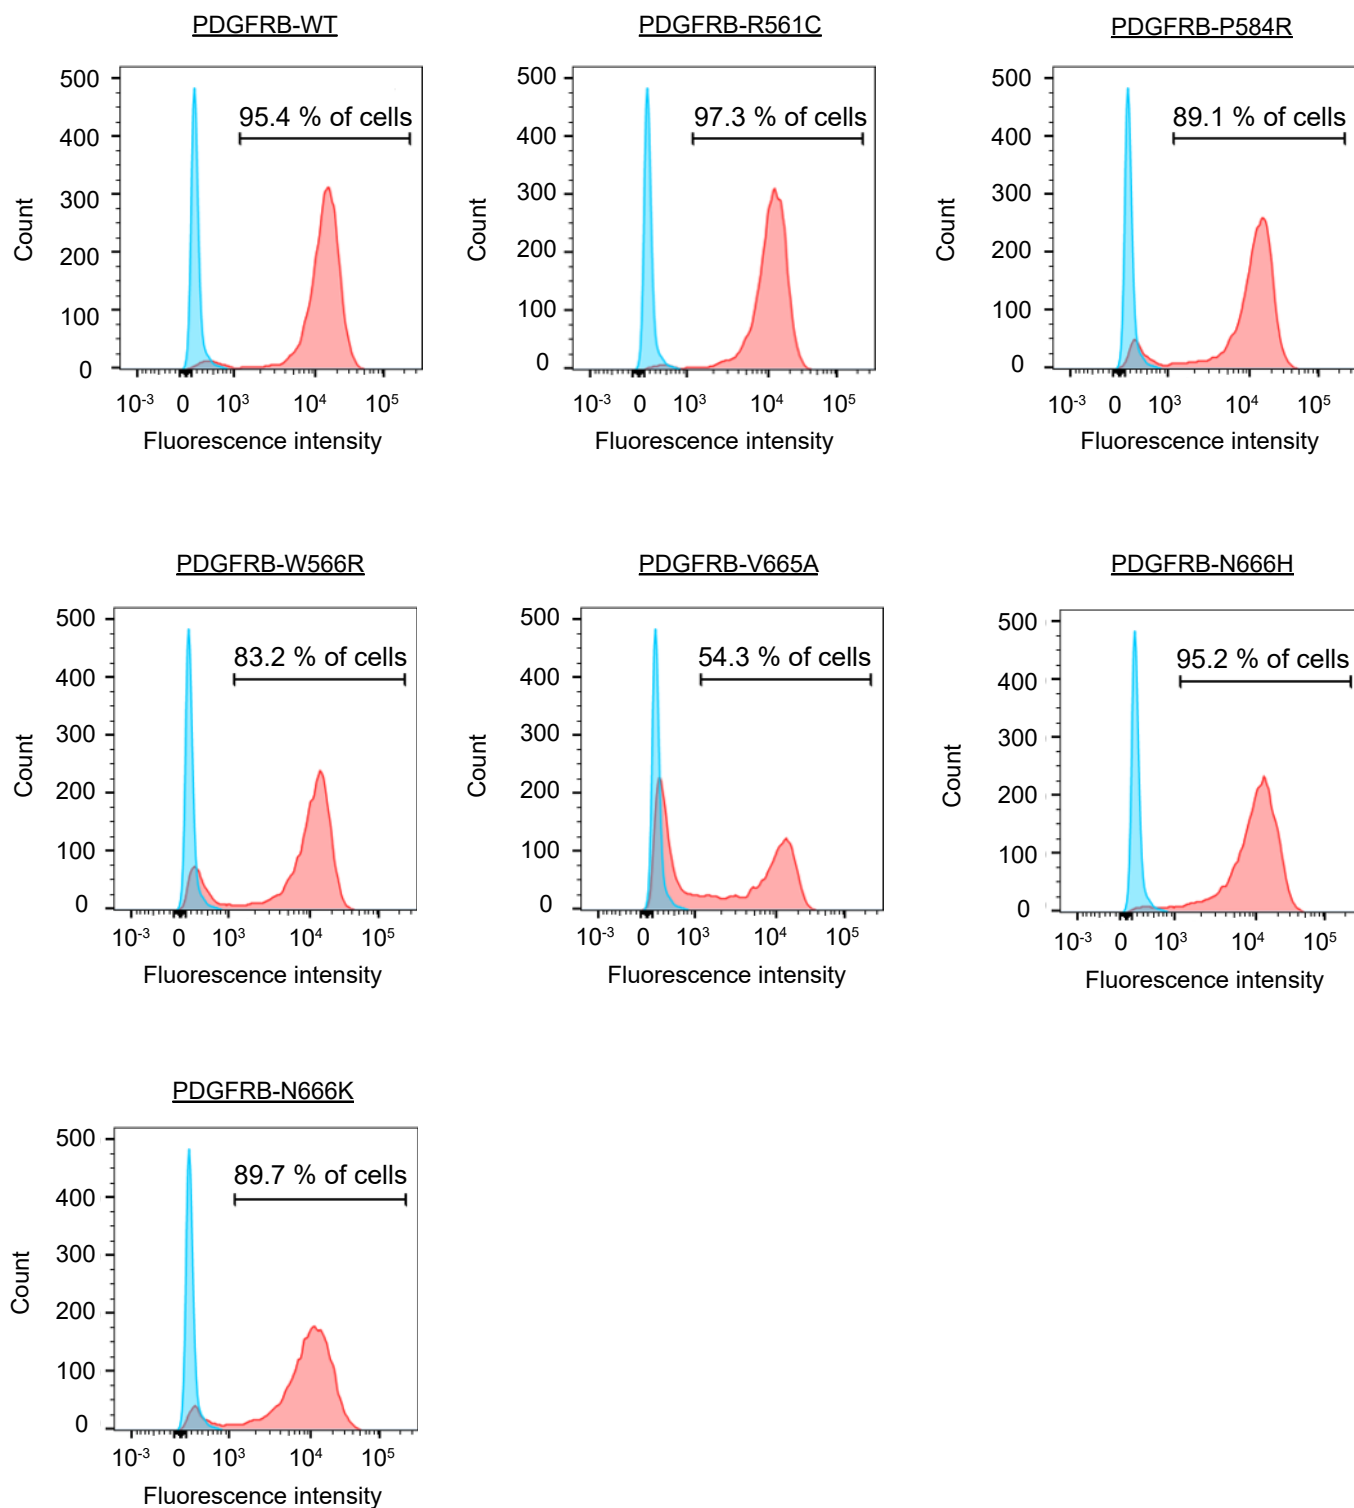

**Supplementary Figure S1.**  
**Cell surface expression of WT and mutant PDGFRB in NIH3T3 cells.**

NIH3T3 cells were transduced with retroviral particles encoding PDGFRB WT, R561C, P584R, W566R, V665A, N666H or N666K . Cells were selected in the presence of puromycin for 10 days and analyzed by flow cytometry. The expression level of the receptors was detected using an anti-PDGFRB antibody as described in the method section. One representative experiment is shown.
